# Supplementary material
Source: ML conference proceedings conference paper supplement (https://proceedings.neurips.cc/paper_files/paper/2023/hash/047682108c3b053c61ad2da5a6057b4e-Abstract.html)
Supplement: Supplementary file 1 [file 047682108c3b053c61ad2da5a6057b4e-Supplemental-Conference.pdf]

---

# Supplementary Materials for the Paper “Towards Free Data Selection with General-Purpose Models”

---

Anonymous Author(s)

Affiliation

Address

email

1 In this supplementary material, we first explain the details of spectral clustering algorithm in Sec. 4.2  
2 of our main paper in Sec. A. We then discuss the effect of different pretraining frameworks and  
3 models in Sec. B. We also analyze the sensitivity of FreeSel to the values of hyperparameters in  
4 Sec. C. Besides, FreeSel is compared with other intuitive baselines using the general-purpose model  
5 in Sec. D. Finally, implementation details of our experiments are explained in Sec. E. Our code will  
6 be made publicly available.

## 7 A Spectral Clustering Algorithm

8 In this section, we explain the spectral clustering algorithm [14, 18] in the semantic pattern extraction  
9 process for each image  $I$  (Sec. 4.2 and Alg. 1 of our main paper). The detailed spectral clustering  
10 algorithm is shown in Alg. 1. This spectral clustering algorithm should be inserted into line 7 of  
11 Alg. 1 in our main paper.

12 To justify the use of spectral clustering algorithm for semantic pattern extraction, we also try another  
13 alternative which directly performs K-Means *w.r.t.* the local features  $f_r^I, r = 1, 2, \dots, t$  to divide  
14 the  $t$  regions of image  $I$  into  $K$  clusters without using the patch token attention to achieve the same  
15 feature clustering goal in Sec. 4.2 of our main paper. Tab. 1 shows the comparison between spectral  
16 clustering and K-Means. Interestingly, these two feature clustering strategies lead to similar data  
17 selection performance on PASCAL VOC [7] object detection task. However, spectral clustering  
18 is stably superior when selecting data samples for Cityscapes [4] semantic segmentation task. We  
19 attribute this difference to the large domain gap between Cityscapes dataset and ImageNet dataset [6].  
20 The DeiT-S model pretrained on ImageNet may extract local features with weaker discriminative  
21 ability from images inside Cityscapes dataset. Since spectral clustering algorithm depends less on the  
22 feature quality, it can bring better performance than direct K-Means over intermediate local features  
23 on Cityscapes.

## 24 B Effect of Pretraining Methods

25 In this part, we pay attention to the effect of pretraining on the final performance of FreeSel. In  
26 addition to the DeiT-S model [17] pretrained with DINO framework [2] in our main paper, we also  
27 adopt two alternative pretraining frameworks MoCoV3 [3] and iBOT [21] as well as a larger DeiT-B  
28 model [17]. Those different pretrained models are applied to the data selection on PASCAL VOC  
29 dataset [7]. Same as Sec. 5.2 of our main paper, we train an SSD-300 model [12] on the selected  
30 samples for the object detection task. Fig. 1 demonstrates that FreeSel with different pretrained  
31 models for data selection only has marginal differences in the performance of the downstream object  
32 detection task. This result verifies that FreeSel can widely fit different pretraining algorithms. The  
33 great performance of data selection comes from our carefully designed modules in FreeSel instead of  
34 the strong representative ability of some specific pretrained models.

---

**Algorithm 1: Spectral Clustering**

---

**Input:** Similarity matrix between patches  $\widehat{\mathbf{p}\mathbf{a}}^I = [\widehat{p a_{ij}}]_{i,j=1,2,\dots,t}$ , semantic pattern number  $K$

**Output:** Clusters  $C_j^I, j = 1, 2, \dots, K$ , where each region  $r = 1, 2, \dots, t$  of image  $I$  belongs to a unique  $C_j^I$ .

- 1 Derive the symmetric adjacent matrix  $\mathbf{A}$  from  $\widehat{\mathbf{p}\mathbf{a}}^I$ :

$$\mathbf{A} = (\widehat{\mathbf{p}\mathbf{a}}^I + \widehat{\mathbf{p}\mathbf{a}}^{IT})/2, \quad \mathbf{A} \in \mathbb{R}^{t \times t}$$

- 2 Derive the diagonal degree matrix  $\mathbf{D}$ :

$$\mathbf{D}_{ij} = \begin{cases} \sum_{l=1}^t \mathbf{A}_{il} & i = j \\ 0 & i \neq j \end{cases}, \quad \mathbf{D} \in \mathbb{R}^{t \times t}$$

- 3 Calculate the normalized Laplacian matrix  $\mathbf{L}$ :

$$\mathbf{L} = \mathbf{D}^{-\frac{1}{2}}(\mathbf{D} - \mathbf{A})\mathbf{D}^{-\frac{1}{2}}, \quad \mathbf{L} \in \mathbb{R}^{t \times t}$$

- 4 Obtain the  $K$  eigenvectors  $v_l, l = 1, 2, \dots, K$  corresponding to the  $K$  smallest eigenvalues  $\sigma_l, l = 1, 2, \dots, K$  of matrix  $\mathbf{L}$ .

- 5 Compose the matrix  $\mathbf{V}$  based on the  $K$  eigenvectors

$$\mathbf{V} = [v_1, v_2, \dots, v_K], \mathbf{V} \in \mathbb{R}^{t \times K}$$

- 6 Denote  $u_i^T$  as the  $i$ -th row of  $\mathbf{V}, i = 1, 2, \dots, t$

- 7 Normalize each row of  $\mathbf{V}$ :  $\hat{u}_i = u_i / \sqrt{\sum_{j=1}^K u_{i,j}^2}$

- 8 Perform K-Means to divide  $\hat{u}_i, i = 1, 2, \dots, t$  into  $K$  clusters  $C_j^I, j = 1, 2, \dots, K$ :

$$\{C_j^I\}_{j=1,2,\dots,K} = KMeans(\{\hat{u}_i\}_{i=1,2,\dots,t})$$

---

Table 1: **Effect of Feature Clustering Strategies:** We compare spectral clustering and K-Means for feature clustering. Experiments are conducted on PASCAL VOC object detection task and Cityscapes semantic segmentation task.

(a) **Performance on PASCAL VOC Object Detection Task:** The task model is SSD-300 [12].

| Feature Clustering  | Image Number |              |              |
|---------------------|--------------|--------------|--------------|
|                     | 3k           | 5k           | 7k           |
| K-Means             | 65.35        | <b>69.43</b> | 71.76        |
| Spectral Clustering | <b>65.66</b> | 69.24        | <b>71.79</b> |

(b) **Performance on Cityscapes Semantic Segmentation Task:** The task model is DRN [20].

| Feature Clustering  | Sampling Ratio |              |              |
|---------------------|----------------|--------------|--------------|
|                     | 15%            | 25%          | 35%          |
| K-Means             | 51.43          | 54.84        | 57.96        |
| Spectral Clustering | <b>51.77</b>   | <b>55.72</b> | <b>58.58</b> |

## 35 C Sensitivity to Hyperparameters

36 In this part, we analyze the sensitivity of our FreeSel to some hyperparameters including the maintenance ratio  $\tau$  in the attention filter (Eq. 2 of our main paper), the semantic pattern number  $K$  (Eq. 4  
37 of our main paper), the neighborhood threshold  $d_0$  (Eq. 3 of our main paper), the distance function  
38  $D(\cdot, \cdot)$  (Eq. 5 of our main paper), and pretraining manner for the general model. Experiments are  
39 conducted on object detection task, where samples are selected from PASCAL VOC dataset and  
40 SSD-300 is the downstream task model in the same settings as Sec. 5.2 of our main paper. Results  
41 are shown in Tab. 2.

43 **Maintenance Ratio  $\tau$  (Eq. 2 of main paper)** Maintenance ratio  $\tau$  notably affects the final performance of FreeSel. Too low ratios lead to the ignorance of some crucial local visual patterns, while  
44 too high ratios introduce some harmful noisy information to the semantic patterns. Thus, a moderate  
45 attention ratio plays an important role in the high performance of FreeSel.

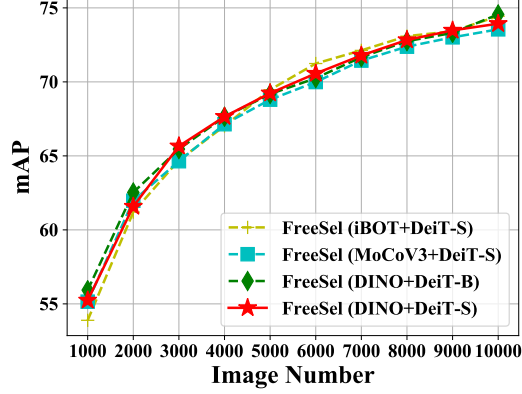

Figure 1: **Effect of Pretraining Methods:** We evaluate the performance of FreeSel with different pretrained models. The red stars denote the results in our main paper. Experiments are conducted on PASCAL VOC dataset with SSD-300 as the object detection task model.

Table 2: **Sensitivity to Hyperparameters:**  $\tau$ ,  $K$ ,  $d_0$ ,  $D(\cdot, \cdot)$  separately denote the maintenance ratio, semantic pattern number, neighborhood threshold, and distance function. Experiments are conducted on PASCAL VOC object detection task.

| $\tau$ | $K$ | $d_0$ | $D(\cdot, \cdot)$ | Pretraining  | Image Number |              |              |
|--------|-----|-------|-------------------|--------------|--------------|--------------|--------------|
|        |     |       |                   |              | 3k           | 5k           | 7k           |
| 0.3    | 5   | 2     | cos.              | unsupervised | 65.22        | 69.00        | 70.69        |
| 0.5    |     |       |                   |              | <b>65.66</b> | 69.24        | <b>71.79</b> |
| 0.7    |     |       |                   |              | 64.77        | 69.33        | 71.64        |
| 0.5    | 10  | 2     | cos.              | unsupervised | 64.90        | 69.01        | 71.02        |
|        |     |       |                   |              | 65.21        | 69.13        | 71.50        |
| 0.5    | 5   | 1     | cos.              | unsupervised | 65.48        | 68.73        | 71.39        |
|        |     |       |                   |              | 65.37        | 69.41        | 71.74        |
| 0.5    | 5   | 2     | euc.              | unsupervised | 64.77        | <b>69.42</b> | 71.31        |
| 0.5    | 5   | 2     | cos.              | supervised   | 64.40        | 68.82        | 71.43        |

47 **Semantic Pattern Number  $K$  (Eq. 4 of main paper)** When  $K = 1$ , the performance is hurt since  
 48 semantic patterns degrade to global features in this case. When  $K = 10$ , a slight performance drop  
 49 may be witnessed in comparison with  $K = 5$ .

50 **Neighborhood Threshold  $d_0$  (Eq. 3 of main paper)** When  $d_0 = 1$ , the neighborhood is too small  
 51 to represent the relationship between nearby regions. When  $d_0 = 3$ , the performance is a little worse  
 52 than  $d_0 = 2$ . We think each region feature mainly interacts with nearby regions with distance  $d \leq 2$ .

53 **Distance Function  $D(\cdot, \cdot)$  (Eq. 5 of main paper)** We find the cosine distance can lead to better  
 54 performance than Euclidean distance. This result shows that the directions of local feature vectors  
 55 are important to reflect the diversity of local visual patterns.

56 **Pretraining Manner** Instead of using the unsupervised pretraining framework DINO [2], we  
 57 also try the DeiT-S model [17] pretrained in a supervised manner on ImageNet [11]. Results show  
 58 a performance drop with supervised pretraining. We think this is because supervised pretraining  
 59 introduces some biases of categories to the pretrained model.

Table 3: **Baselines Using General-Purpose Model:** We compare FreeSel with other baselines using the general-purpose model. Experiments are conducted on PASCAL VOC object detection task.

| Methods       | Pretrained Model    | Image Number |              |              |
|---------------|---------------------|--------------|--------------|--------------|
|               |                     | 3k           | 5k           | 7k           |
| K-Means       | DeiT-S (DINO)       | 64.85        | 68.05        | 71.50        |
| Inconsistency | DeiT-S (DINO)       | 63.29        | 67.65        | 71.35        |
| Entropy       | DeiT-S (supervised) | 56.33        | 66.03        | 69.72        |
| FreeSel       | DeiT-S (DINO)       | <b>65.66</b> | <b>69.24</b> | <b>71.79</b> |

## D Baselines Using General-Purpose Model

To further disentangle the roles of the general-purpose model and our designed FreeSel framework, we compare FreeSel with the following baselines which can also select a subset from the data pool using the general-purpose models.

- **K-Means:** We perform the K-Means algorithm on the global features extracted by the DeiT-S model [17] pretrained with DINO [2]. The cluster number equals to the annotation budget size, and we choose the sample closest to each cluster center.
- **Inconsistency:** We select the most difficult samples based on the inconsistency of multiple-time model predictions. To measure the inconsistency, we perform data augmentations (RandAugment [5]) to generate 10 different augmented copies for each image. The inconsistency is measured by calculating the average pairwise distances of global features between these copies extracted by the DeiT-S model [17] pretrained with DINO [2]. We select data samples by the order of inconsistency.
- **Entropy:** We select the most ambiguous samples based on the classification uncertainty of the pretrained model. Since the classification score is required, we adopt the DeiT-S model [17] pretrained on ImageNet in a supervised manner and measure the uncertainty with the entropy of classification scores. We select data samples by the order of entropy.

Experiments are conducted on object detection task, where samples are selected from PASCAL VOC dataset and SSD-300 is the downstream task model in the same settings as Sec. 5.2 of our main paper. Tab. 3 shows that all the above baselines perform notably worse than FreeSel, especially with low sampling ratios. This reflects the importance of our proposed FreeSel algorithm. Trivial utilization of a general-purpose model would not lead to great performance of data selection.

## E Implementation Details

### E.1 Object Detection Implementation

#### E.1.1 Implementation of FreeSel

We set attention ratio  $\tau = 0.5$  and semantic pattern number  $K = 5$ . The input images are resized to  $224 \times 224$  when fed into the pretrained DeiT-S [17] model in the data selection process.

#### E.1.2 Implementation of Task Model

The implementation of task model is same as previous active learning research [19, 1]. The SSD-300 model [12] with VGG-16 [15] backbone is adopted for this experiment. The model is implemented based on mmdetection<sup>1</sup>. We follow [19, 1] to train the model for 300 epochs with batch size 32 using SGD optimizer (momentum 0.9). The initial learning rate is 0.001, which decays to 0.0001 after 240 epochs.

<sup>1</sup><https://github.com/open-mmlab/mmdetection>

## 93 **E.2 Semantic Segmentation Implementation**

### 94 **E.2.1 Implementation of FreeSel**

95 The input images are resized to  $448 \times 224$  in line with their original aspect ratios when fed into the  
96 pretrained DeiT-S [17] model in the data selection process. Same as object detection, we set attention  
97 ratio  $\tau = 0.5$  and semantic pattern number is doubled to  $K = 10$  in line with the doubled input size  
98 compared to object detection task.

### 99 **E.2.2 Implementation of Task Model**

100 We follow prior active learning work [16, 9] to apply DRN [20] model<sup>2</sup> for semantic segmentation  
101 task. The model is trained for 50 epochs with batch size 8 and learning rate  $5e-4$  using Adam  
102 optimizer [10].

## 103 **E.3 Image Classification Implementation**

### 104 **E.3.1 Implementation of FreeSel**

105 We follow previous tasks to set attention ratio  $\tau = 0.5$ . Since image classification depends less on  
106 local information, we directly set the semantic pattern number  $K = 1$ . The input images are resized  
107 to  $224 \times 224$  when fed into the pretrained DeiT-S [17] model in the data selection process.

### 108 **E.3.2 Implementation of Task Model**

109 We follow [19, 13] to use ResNet-18 [8] classification model in this task, which is implemented based  
110 on mmclassification<sup>3</sup>. The model is trained for 200 epochs with batch size 128 using SGD optimizer  
111 (momentum 0.9, weight decay  $5e-4$ ). The initial learning rate is 0.1, which decays to 0.01 after 160  
112 epochs. We apply standard data augmentation to the training including  $32 \times 32$  size random crop from  
113  $36 \times 36$  zero-padded images and random horizontal flip.

---

<sup>2</sup><https://github.com/fyu/drn>

<sup>3</sup><https://github.com/open-mmlab/mclassification>

## References

- [1] S. Agarwal, H. Arora, S. Anand, and C. Arora. Contextual diversity for active learning. In *European Conference on Computer Vision*, pages 137–153. Springer, 2020.
- [2] M. Caron, H. Touvron, I. Misra, H. Jégou, J. Mairal, P. Bojanowski, and A. Joulin. Emerging properties in self-supervised vision transformers. *arXiv preprint arXiv:2104.14294*, 2021.
- [3] X. Chen, S. Xie, and K. He. An empirical study of training self-supervised vision transformers. *arXiv preprint arXiv:2104.02057*, 2021.
- [4] M. Cordts, M. Omran, S. Ramos, T. Rehfeld, M. Enzweiler, R. Benenson, U. Franke, S. Roth, and B. Schiele. The cityscapes dataset for semantic urban scene understanding. In *Proceedings of the IEEE conference on computer vision and pattern recognition*, pages 3213–3223, 2016.
- [5] E. D. Cubuk, B. Zoph, J. Shlens, and Q. V. Le. Randaugment: Practical automated data augmentation with a reduced search space. In *Proceedings of the IEEE/CVF conference on computer vision and pattern recognition workshops*, pages 702–703, 2020.
- [6] J. Deng, W. Dong, R. Socher, L.-J. Li, K. Li, and L. Fei-Fei. Imagenet: A large-scale hierarchical image database. In *2009 IEEE conference on computer vision and pattern recognition*, pages 248–255. Ieee, 2009.
- [7] M. Everingham, L. Van Gool, C. K. Williams, J. Winn, and A. Zisserman. The pascal visual object classes (voc) challenge. *International journal of computer vision*, 88(2):303–338, 2010.
- [8] K. He, X. Zhang, S. Ren, and J. Sun. Deep residual learning for image recognition. In *Proceedings of the IEEE conference on computer vision and pattern recognition*, pages 770–778, 2016.
- [9] S. Huang, T. Wang, H. Xiong, J. Huan, and D. Dou. Semi-supervised active learning with temporal output discrepancy. In *Proceedings of the IEEE/CVF International Conference on Computer Vision (ICCV)*, 2021.
- [10] D. P. Kingma and J. Ba. Adam: A method for stochastic optimization. *arXiv preprint arXiv:1412.6980*, 2014.
- [11] A. Krizhevsky, I. Sutskever, and G. E. Hinton. Imagenet classification with deep convolutional neural networks. *Advances in neural information processing systems*, 25:1097–1105, 2012.
- [12] W. Liu, D. Anguelov, D. Erhan, C. Szegedy, S. Reed, C.-Y. Fu, and A. C. Berg. Ssd: Single shot multibox detector. In *European conference on computer vision*, pages 21–37. Springer, 2016.
- [13] Z. Liu, H. Ding, H. Zhong, W. Li, J. Dai, and C. He. Influence selection for active learning. In *Proceedings of the IEEE/CVF International Conference on Computer Vision*, pages 9274–9283, 2021.
- [14] A. Ng, M. Jordan, and Y. Weiss. On spectral clustering: Analysis and an algorithm. *Advances in neural information processing systems*, 14, 2001.
- [15] K. Simonyan and A. Zisserman. Very deep convolutional networks for large-scale image recognition. *arXiv preprint arXiv:1409.1556*, 2014.
- [16] S. Sinha, S. Ebrahimi, and T. Darrell. Variational adversarial active learning. In *Proceedings of the IEEE/CVF International Conference on Computer Vision*, pages 5972–5981, 2019.
- [17] H. Touvron, M. Cord, M. Douze, F. Massa, A. Sablayrolles, and H. Jégou. Training data-efficient image transformers & distillation through attention. In *International Conference on Machine Learning*, pages 10347–10357. PMLR, 2021.
- [18] D. Yan, L. Huang, and M. I. Jordan. Fast approximate spectral clustering. In *Proceedings of the 15th ACM SIGKDD international conference on Knowledge discovery and data mining*, pages 907–916, 2009.

- 159 [19] D. Yoo and I. S. Kweon. Learning loss for active learning. In *Proceedings of the IEEE/CVF*  
160 *Conference on Computer Vision and Pattern Recognition*, pages 93–102, 2019.
- 161 [20] F. Yu, V. Koltun, and T. Funkhouser. Dilated residual networks. In *Proceedings of the IEEE*  
162 *conference on computer vision and pattern recognition*, pages 472–480, 2017.
- 163 [21] J. Zhou, C. Wei, H. Wang, W. Shen, C. Xie, A. Yuille, and T. Kong. ibot: Image bert pre-training  
164 with online tokenizer. *arXiv preprint arXiv:2111.07832*, 2021.
